# Supplementary material for: The Xanthomonas campestris Type III Effector XopJ Targets the Host Cell Proteasome to Suppress Salicylic-Acid Mediated Plant Defence
Source: PubMed Central journal article supplement (PMC3681735; doi:10.1371/journal.ppat.1003427), 2013-06-13
Supplement: ppat.1003427.s002.pdf [file ppat.1003427.s002.pdf]

**Figure S2**

**FBPase-YFP<sup>N</sup>/  
FBPase-YFP<sup>C</sup>**

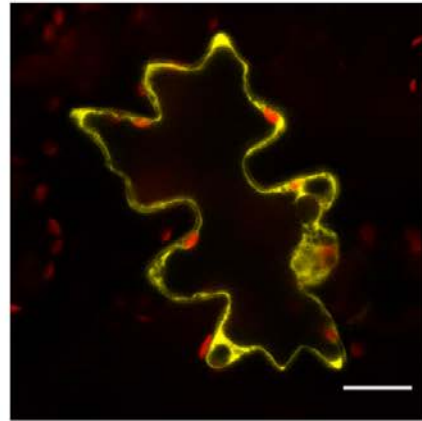

**FBPase-YFP<sup>N</sup>/  
NtRPT6-YFP<sup>C</sup>**

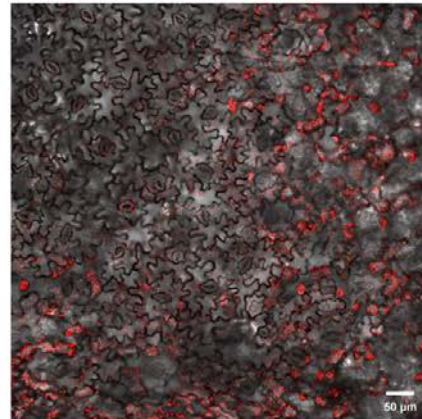

**FBPase-YFP<sup>C</sup>/  
XopJ-YFP<sup>N</sup>**

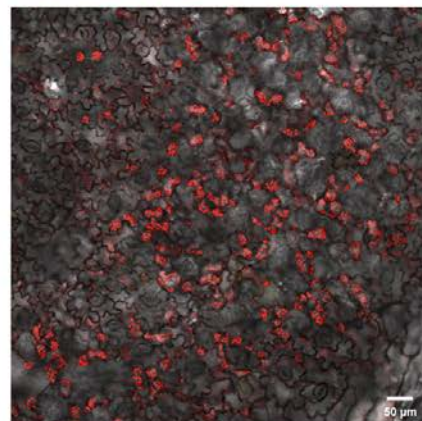

**Figure S2: Control experiments for BiFC assays.** YFP confocal microscopy images show a merge YFP- and chlorophyll auto-fluorescence of tobacco leaf epidermal cells transiently expressing constructs encoding the fusion proteins indicated. Each image is the representative of at least three experiments.
