# Supplementary material for: The Xanthomonas campestris Type III Effector XopJ Targets the Host Cell Proteasome to Suppress Salicylic-Acid Mediated Plant Defence
Source: PubMed Central journal article supplement (PMC3681735; doi:10.1371/journal.ppat.1003427), 2013-06-13
Supplement: ppat.1003427.s007.pdf [file ppat.1003427.s007.pdf]

**Figure S7**

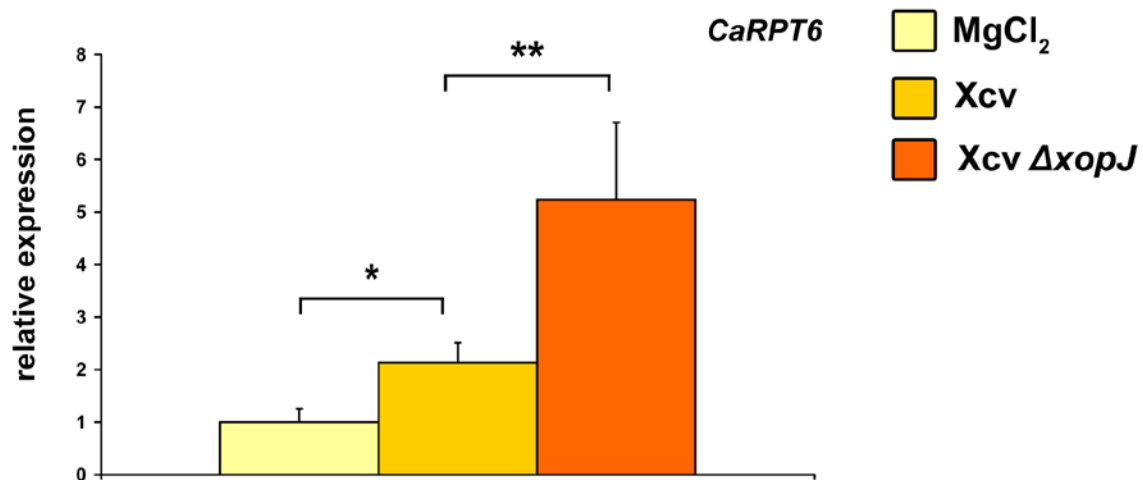

**Figure S7: RPT6 gene expression during compatible Xcv-pepper interaction**

Total RNA was isolated from pepper leaves infiltrated with  $2 \times 10^8$  cfu/mL of Xcv, Xcv  $\Delta$ xopJ and 1mM MgCl<sub>2</sub>. Quantitative real-time RT-PCR was performed for *CaRPT6* three dpi. *Actin* expression was used to normalize the expression value in each sample, and relative expression values were determined against the average value of the sample infected with 1mM MgCl<sub>2</sub>. Leaf material from 4 independent pepper plants was pooled and analyzed in triplicates. Data represent the mean SD. Significant differences were calculated using Student's t-test and are indicated by: \*, P < 0.05; \*\*, P < 0.01
