# Supplementary material for: The Xanthomonas campestris Type III Effector XopJ Targets the Host Cell Proteasome to Suppress Salicylic-Acid Mediated Plant Defence
Source: PLOS journal article supplement (doi:10.1371/journal.ppat.1003427), 2013-06-13
Supplement: S4 (10.1371/journal.ppat.1003427.s004) [file journal.ppat.1003427.s004]

## Figure S4

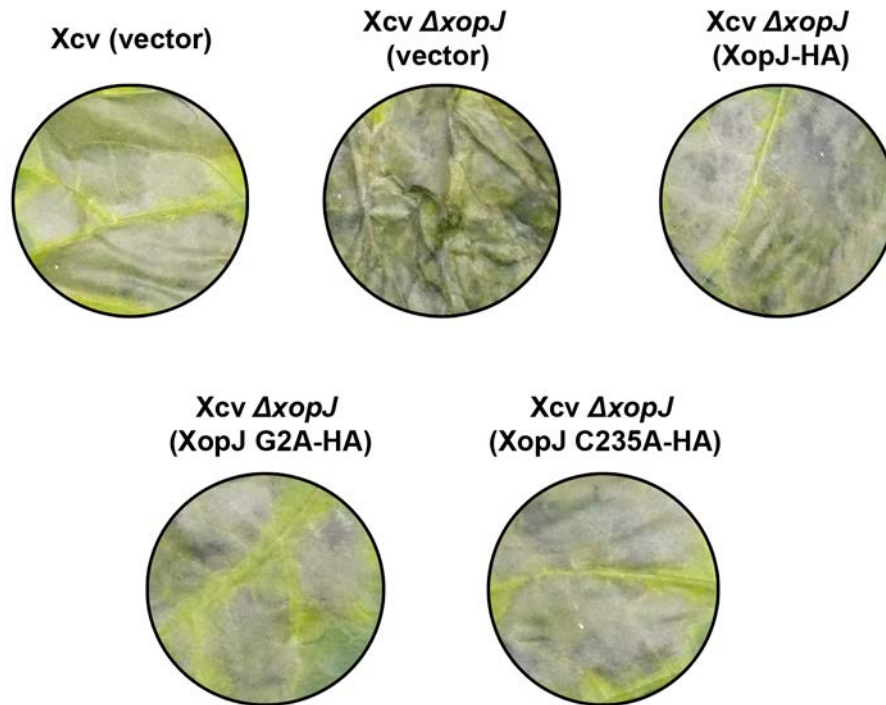

**Figure S4: Phenotype of *Xcv* infected pepper leaves 5 dpi.** *Xcv* (vector), *Xcv ΔxopJ* (vector), *Xcv ΔxopJ* (XopJ-HA), XopJ (G2A-HA) and (C235A-HA) were inoculated at a bacterial density of  $2 \times 10^8$  cfu ml<sup>-1</sup> into leaves of pepper ECW plants. Pictures were taken at 5 dpi.
