# Supplementary material for: The Xanthomonas campestris Type III Effector XopJ Targets the Host Cell Proteasome to Suppress Salicylic-Acid Mediated Plant Defence
Source: PLOS journal article supplement (doi:10.1371/journal.ppat.1003427), 2013-06-13
Supplement: S5 (10.1371/journal.ppat.1003427.s005) [file journal.ppat.1003427.s005]

## Figure S5

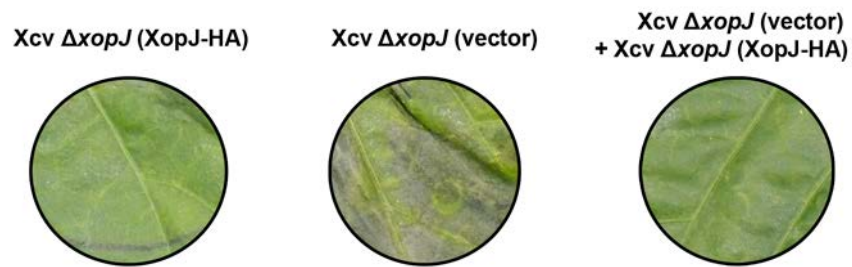

**Figure S5: XopJ delivered by a complemented *Xcv ΔxopJ* (XopJ-HA) is able to suppress the phenotype of the *Xcv ΔxopJ* strain in a mixed inoculum experiment.** Leaves of pepper ECW plants were first inoculated with *Xcv ΔxopJ* (XopJ-HA) at a density of  $2 \times 10^8$  cfu ml<sup>-1</sup>. After 3h the same leaf region was inoculated with *Xcv ΔxopJ* bacteria of the same density. The phenotype of the infected leaf was recorded 3 dpi.
