# Supplementary material for: The Xanthomonas campestris Type III Effector XopJ Targets the Host Cell Proteasome to Suppress Salicylic-Acid Mediated Plant Defence
Source: PLOS journal article supplement (doi:10.1371/journal.ppat.1003427), 2013-06-13
Supplement: S8 (10.1371/journal.ppat.1003427.s008) [file journal.ppat.1003427.s008]

## Figure S8

**A**

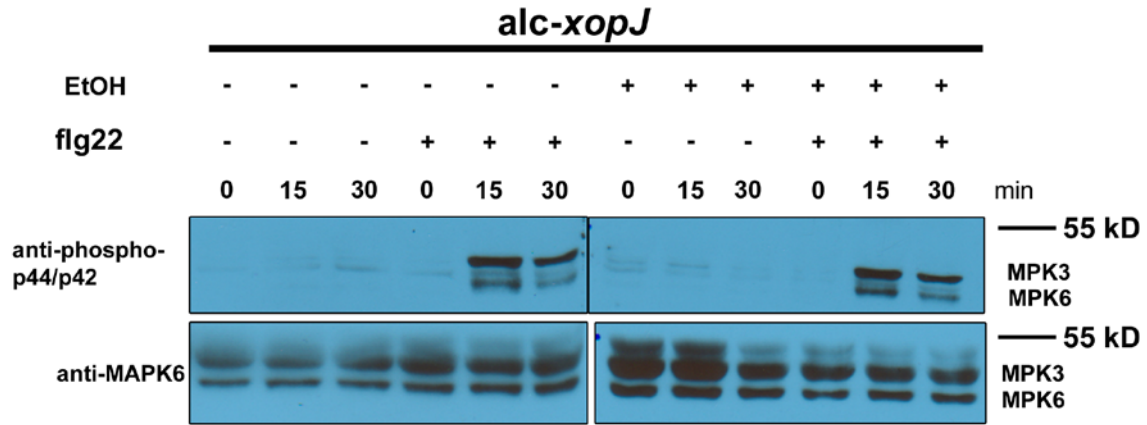

**B**

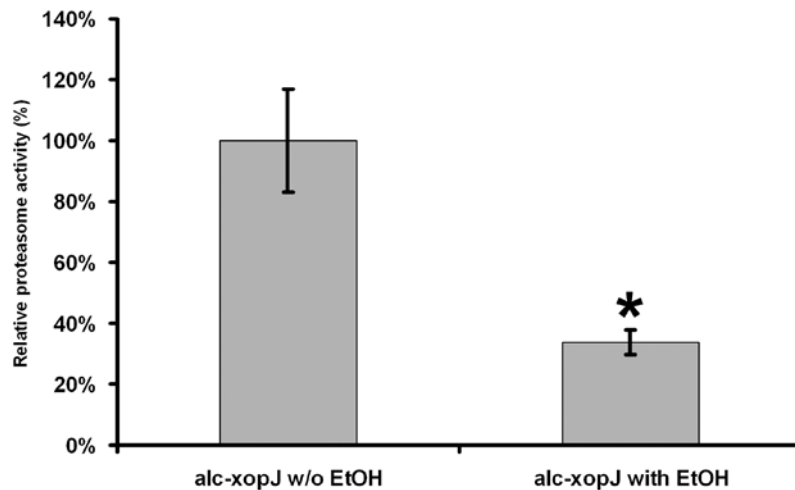

**Figure S8: XopJ does not inhibit flg22-triggered MAPK signalling in Arabidopsis.** (A) flg22 mediated MAPK activation un-induced alc-XopJ plant in comparison to those induced with ethanol. Leaves were treated with 1  $\mu$ M flg22, and MAPK activation was analyzed at the indicated time points. Upper panel: protein extracts (15  $\mu$ g per lane) were subjected to western-blot analysis using the phospho-p44/p42 MAPK antibody. Arrowheads indicate the positions of MPK3 and MPK6. Lower panel: equal protein level of MPK3 and MPK6 in each lane was verified using an anti-MPK6 antibody. (B) Proteasome activity before and after treatment of alc-XopJ plants with 1% ethanol. Data represent the mean SD. Significant differences were calculated using Student's t-test and are indicated by: \*,  $P < 0.05$ .
